# Supplementary material for: Bulk assembly of a 0D organic tin(ii)chloride hybrid with high anti-water stability
Source: Royal Society of Chemistry journal article supplement (doi:10.1039/d1cc02814f), 2021-01-01
Supplement: d1cc02814f1.pdf [file d1cc02814f1.pdf]

## Supporting Information

### **Bulk assembly of 0D organic tin(II) chloride hybrid with high anti-water stability**

Hui Peng,<sup>a,b,c,d†</sup> Xinxin Wang,<sup>a†</sup> Zhenheng Zhang,<sup>a</sup> Ye Tian,<sup>a</sup> Yonghao Xiao,<sup>d</sup> Jinming Hu,<sup>a</sup> Jianping Wang,<sup>\*c iD</sup> and Bingsuo Zou<sup>\*b iD</sup>

<sup>a</sup>Beijing Key Laboratory of Nanophotonics & Ultrafine Optoelectronic Systems, Beijing Institute of Technology, Beijing 100081, China.

<sup>b</sup>Guangxi Key Lab of Processing for Nonferrous Metals and Featured Materials and Key lab of new Processing Technology for Nonferrous Metals and Materials, Ministry of Education; School of Resources, Environments and Materials, Guangxi University, Nanning 530004, China.

<sup>c</sup>Beijing National Laboratory for Molecular Sciences, Institute of Chemistry, Chinese Academy of Sciences, Beijing 100190, China.

<sup>d</sup>School of Materials Science & Engineering, Beijing Institute of Technology, Beijing 100081, China.

\*Corresponding Author: E-mail: jwang@iccas.ac.cn, zoubs@gxu.edu.cn

## EXPERIMENTAL SECTION

**Materials and preparation:** Tin(II) chloride ( $\text{SnCl}_2$ , 99 %), tetrabutylammonium chloride (TBAC,  $\geq 98\%$ ), hydrochloric acid (HCl, 38%), and hypophosphoric acid ( $\text{H}_3\text{PO}_2$ , 50 wt.% in water) were purchased from Aladdin reagent and used as received. The single crystals of  $(\text{TBAC})\text{CuCl}_2$  were prepared via solution temperature-lowering method. Typically, 3 mmol  $\text{SnCl}_2$  and 3 mmol TBAC were fully dissolved in 10 mL HCl and 1.5 mL  $\text{H}_3\text{PO}_2$  mixed solution at  $130\text{ }^\circ\text{C}$ , and continuously stirred for 2 hours. The above mixed solution was left in the atmosphere for above 24 hours, and bulk crystals of  $(\text{TBAC})\text{SnCl}_3$  can be obtained.

**2.2 Characterization.** The parameter of crystal structure was characterized by D8 QUEST single crystal X-ray diffraction (SCXRD) at 220 K. Empyrean Alpha was used to collect powder XRD (PXRD) data. FluoroMax-4 spectrometer was used to measure PL and PLE spectra at RT. The Edinburgh PLS980 was used to collect the PLQY data. The temperature-dependent decay lifetime and PL data were also obtained by FLS980 instrument. The powder absorption spectrum was implemented by UV-3600 spectrometer. HORIBA JY spectrometer was used to measure the Raman spectrum excited by 532 nm laser. Quantera II was used to record the X-ray photoelectron spectroscopy (XPS) data. The thermal stability was performed by PE TGA 4000 instrument.

Table S1. Crystal data and structure refinement for (TBAC)SnCl<sub>3</sub> single crystal.

| Empirical formula                           | C <sub>16</sub> H <sub>36</sub> Cl <sub>3</sub> NSn           |
|---------------------------------------------|---------------------------------------------------------------|
| Formula weight                              | 467.50                                                        |
| Temperature/K                               | 220.01(10)                                                    |
| Crystal system                              | monoclinic                                                    |
| Space group                                 | P2 <sub>1</sub> /n                                            |
| a/Å                                         | 9.7485(5)                                                     |
| b/Å                                         | 13.2735(5)                                                    |
| c/Å                                         | 18.4175(10)                                                   |
| α/°                                         | 90                                                            |
| β/°                                         | 104.528(5)                                                    |
| γ/°                                         | 90                                                            |
| Volume/Å <sup>3</sup>                       | 2307.0(2)                                                     |
| Z                                           | 4                                                             |
| ρ <sub>calc</sub> /g/cm <sup>3</sup>        | 1.346                                                         |
| μ/mm <sup>-1</sup>                          | 1.451                                                         |
| F(000)                                      | 960.0                                                         |
| Crystal size/mm <sup>3</sup>                | 0.17 × 0.15 × 0.12                                            |
| Radiation                                   | MoKα (λ = 0.71073)                                            |
| 2θ range for data collection/°              | 3.826 to 61.996                                               |
| Index ranges                                | -12 ≤ h ≤ 10, -18 ≤ k ≤ 16, -25 ≤ l ≤ 25                      |
| Reflections collected                       | 19216                                                         |
| Independent reflections                     | 6208 [R <sub>int</sub> = 0.0174, R <sub>sigma</sub> = 0.0209] |
| Data/restraints/parameters                  | 6208/97/232                                                   |
| Goodness-of-fit on F <sup>2</sup>           | 1.087                                                         |
| Final R indexes [ I  ≥ 2σ (I)]              | R <sub>1</sub> = 0.0742, wR <sub>2</sub> = 0.2097             |
| Final R indexes [all data]                  | R <sub>1</sub> = 0.1087, wR <sub>2</sub> = 0.2304             |
| Largest diff. peak/hole / e Å <sup>-3</sup> | 1.86/-1.07                                                    |

Table S2. Fractional Atomic Coordinates ( $\times 10^4$ ) and Equivalent Isotropic Displacement Parameters ( $\text{\AA}^2 \times 10^3$ ) for (TBAC)SnCl<sub>3</sub> single crystal.  $U_{\text{eq}}$  is defined as 1/3 of the trace of the orthogonalised  $U_{ij}$  tensor.

| Atom | <i>x</i>    | <i>y</i>   | <i>z</i>   | $U(\text{eq})$ |
|------|-------------|------------|------------|----------------|
| Sn1  | 10402.8(5)  | 7197.8(3)  | 8520.1(3)  | 91.9(2)        |
| Cl2  | 11385.6(19) | 8671.8(14) | 9255.4(10) | 99.2(5)        |
| Cl3  | 8076(2)     | 7301.9(17) | 8753.7(12) | 107.8(6)       |
| Cl4  | 9732(4)     | 8106(3)    | 7347.6(12) | 202.7(19)      |
| N9   | 4939(5)     | 6833(4)    | 6451(2)    | 69.6(11)       |
| C10  | 5653(7)     | 7840(4)    | 6511(3)    | 78.3(15)       |
| C11  | 6095(7)     | 8217(5)    | 5834(3)    | 79.7(15)       |
| C14  | 5827(6)     | 6031(4)    | 6218(4)    | 79.9(15)       |
| C8   | 3548(6)     | 6855(7)    | 5858(4)    | 95(2)          |
| C18  | 4713(7)     | 6645(6)    | 7212(3)    | 97(2)          |
| C15  | 7280(7)     | 5868(6)    | 6707(5)    | 100(2)         |
| C12  | 6635(9)     | 9293(5)    | 5958(5)    | 107(2)         |
| C13  | 7189(11)    | 9691(6)    | 5325(5)    | 124(3)         |
| C16  | 8057(10)    | 5103(7)    | 6316(7)    | 147(4)         |
| C20  | 3140(40)    | 5900(40)   | 7963(19)   | 175(10)        |
| C7   | 2460(9)     | 7477(10)   | 5861(5)    | 148(4)         |
| C19  | 3880(10)    | 5749(7)    | 7328(5)    | 128(3)         |
| C6   | 1176(14)    | 7000(14)   | 5276(10)   | 147(6)         |
| C17  | 9480(12)    | 4864(10)   | 6751(8)    | 171(5)         |
| C21  | 4230(70)    | 5790(80)   | 8716(12)   | 174(13)        |
| C5   | -45(14)     | 7731(15)   | 5267(10)   | 155(7)         |
| C6A  | 1060(20)    | 7650(20)   | 5259(17)   | 152(7)         |
| C5A  | 420(30)     | 6620(20)   | 5374(16)   | 180(10)        |
| C20A | 3925(12)    | 5775(11)   | 8202(6)    | 160(6)         |
| C21A | 3069(15)    | 4911(11)   | 8337(7)    | 178(7)         |

Table S3. Bond lengths and bond angles for (TBAC)SnCl<sub>3</sub> single crystal.

| Atom | Atom | Length/Å   | Atom | Atom | Atom | Angle/°   |
|------|------|------------|------|------|------|-----------|
| Sn1  | Cl2  | 2.4349(19) | Cl3  | Sn1  | Cl2  | 96.37(7)  |
| Sn1  | Cl3  | 2.416(2)   | Cl4  | Sn1  | Cl2  | 94.39(9)  |
| Sn1  | Cl4  | 2.416(3)   | Cl4  | Sn1  | Cl3  | 94.29(11) |
| N9   | C10  | 1.498(8)   | C10  | N9   | C14  | 111.3(4)  |
| N9   | C14  | 1.500(7)   | C10  | N9   | C8   | 110.6(5)  |
| N9   | C8   | 1.513(7)   | C14  | N9   | C8   | 106.5(5)  |
| N9   | C18  | 1.495(7)   | C18  | N9   | C10  | 104.8(5)  |
| C10  | C11  | 1.504(9)   | C18  | N9   | C14  | 112.4(5)  |
| C11  | C12  | 1.520(9)   | C18  | N9   | C8   | 111.4(5)  |
| C14  | C15  | 1.492(9)   | N9   | C10  | C11  | 117.3(5)  |
| C8   | C7   | 1.346(12)  | C10  | C11  | C12  | 110.4(5)  |
| C18  | C19  | 1.485(8)   | C15  | C14  | N9   | 117.3(5)  |
| C15  | C16  | 1.549(12)  | C7   | C8   | N9   | 125.0(7)  |
| C12  | C13  | 1.498(11)  | C19  | C18  | N9   | 118.9(6)  |
| C16  | C17  | 1.452(14)  | C14  | C15  | C16  | 108.4(7)  |
| C20  | C19  | 1.534(19)  | C13  | C12  | C11  | 113.1(6)  |
| C20  | C21  | 1.53(2)    | C17  | C16  | C15  | 113.5(10) |
| C7   | C6   | 1.565(9)   | C21  | C20  | C19  | 109.1(19) |
| C7   | C6A  | 1.544(10)  | C8   | C7   | C6   | 104.1(10) |
| C19  | C20A | 1.601(11)  | C8   | C7   | C6A  | 130.1(18) |
| C6   | C5   | 1.532(10)  | C18  | C19  | C20  | 112.4(17) |
| C6A  | C5A  | 1.531(10)  | C18  | C19  | C20A | 104.4(8)  |
| C20A | C21A | 1.476(15)  | C5   | C6   | C7   | 103.7(11) |
|      |      |            | C5A  | C6A  | C7   | 95.0(15)  |
|      |      |            | C21A | C20A | C19  | 106.2(10) |

Table S4. Comparison of the Photophysical Properties for Selected Low Dimensional Metal Halides.

| Components                                                                        | Excitation<br>peak (nm) | Emission<br>peaks (nm) | Stokes<br>shift (nm) | FWHM<br>(nm) | Dimensio<br>nality | Ref.         |
|-----------------------------------------------------------------------------------|-------------------------|------------------------|----------------------|--------------|--------------------|--------------|
| (C <sub>13</sub> H <sub>19</sub> N <sub>4</sub> ) <sub>2</sub> PbBr <sub>4</sub>  | 349                     | 460                    | 111                  | 66           | 0D                 | 1            |
| Cs <sub>4</sub> SnBr <sub>6</sub>                                                 | 340                     | 540                    | 200                  | —            | 0D                 | 2            |
| (C <sub>4</sub> N <sub>2</sub> H <sub>14</sub> Br) <sub>4</sub> SnBr <sub>6</sub> | 355                     | 570                    | 215                  | 105          | 0D                 | 3            |
| (C <sub>8</sub> H <sub>14</sub> N <sub>2</sub> ) <sub>2</sub> SnBr <sub>6</sub>   | 425                     | 507                    | 82                   | 157          | 0D                 | 4            |
| Rb <sub>2</sub> CuBr <sub>3</sub>                                                 | 300                     | 385                    | 85                   | 54           | 1D                 | 5            |
| K <sub>2</sub> CuCl <sub>3</sub>                                                  | 291                     | 392                    | 101                  | 54           | 1D                 | 6            |
| C <sub>5</sub> H <sub>16</sub> N <sub>2</sub> Pb <sub>2</sub> Br <sub>6</sub>     | 285                     | 565                    | 280                  | 198          | 1D                 | 7            |
| (N-MEDA)[PbBr <sub>4</sub> ]                                                      | 388                     | 558                    | 170                  | 165          | 2D                 | 8            |
| (OCTAm) <sub>2</sub> SnBr <sub>4</sub>                                            | 350                     | 600                    | 250                  | 136          | 2D                 | 9            |
| (C <sub>6</sub> H <sub>13</sub> NH <sub>3</sub> ) <sub>2</sub> SnBr <sub>4</sub>  | ~335                    | 618                    | 283                  | 136          | 2D                 | 10           |
| (TBAC)SnCl <sub>3</sub>                                                           | 263                     | 523                    | 260                  | 56           | 0D                 | This<br>work |

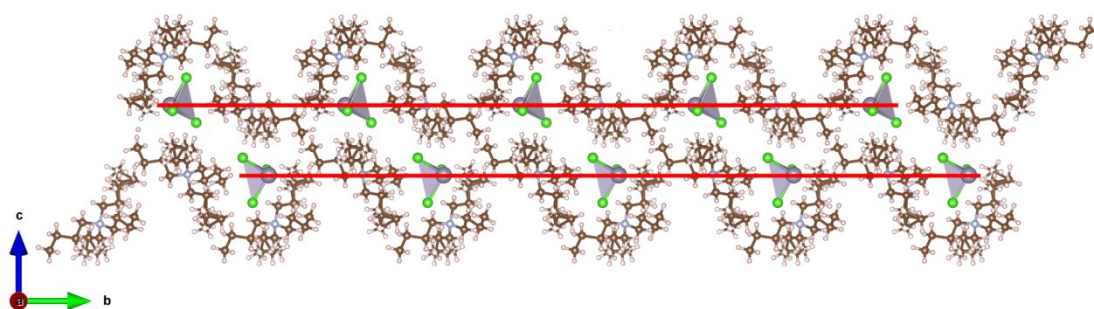

Figure S1. The crystal structure of (TBAC)SnCl<sub>3</sub> viewed long the a-axis direction, it can be clearly see that the [SnCl<sub>3</sub>]<sup>-</sup> clusters are arranged in a straight line along the b-axis.

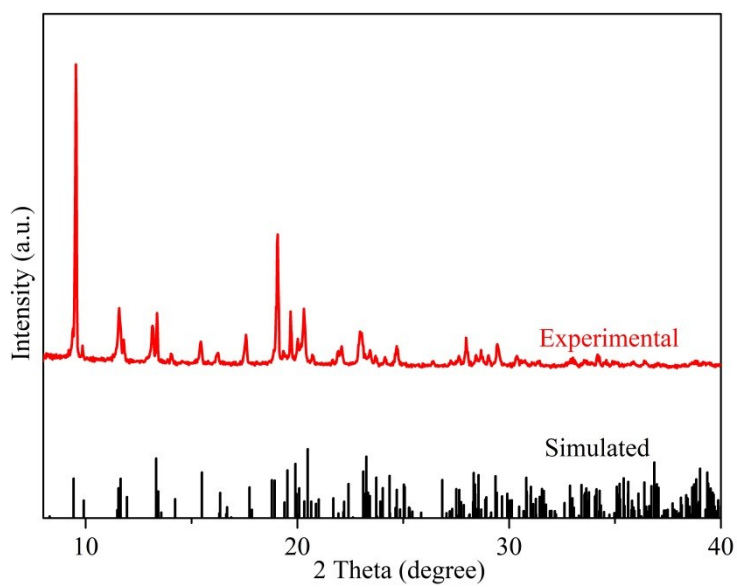

Figure S2. Experimental and simulated PXRD patterns of (TBAC)SnCl<sub>3</sub>.

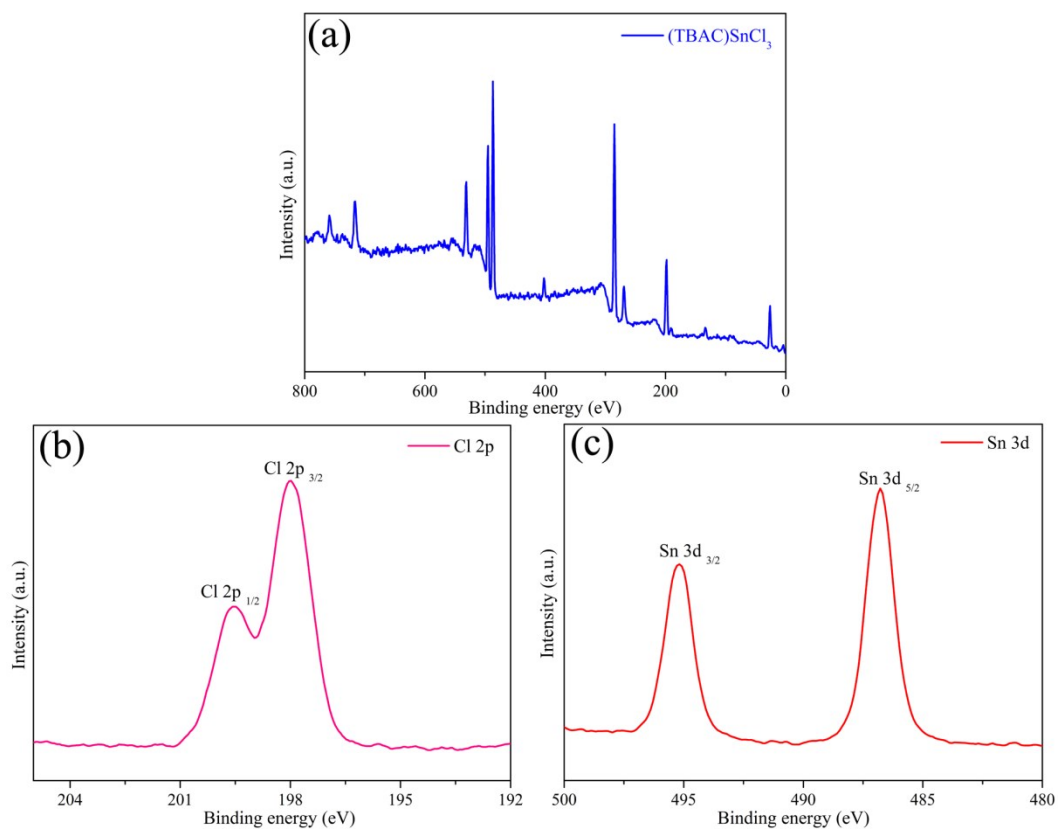

Figure S3. X-ray photoelectron spectroscopic (XPS) analysis of (TBAC)SnCl<sub>3</sub> powders and the high-resolution spectra of (b) Cl 2p and (c) Sn 3d.

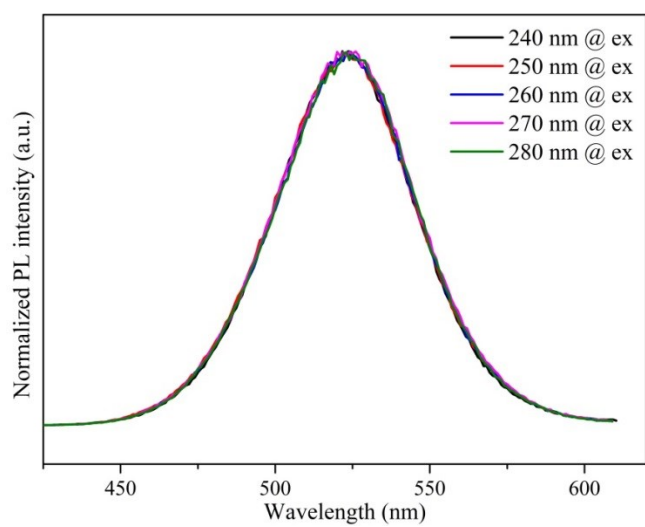

Figure S4. Excitation-wavelength dependent PL spectra of (TBAC)SnCl<sub>3</sub> SCs at room temperature.



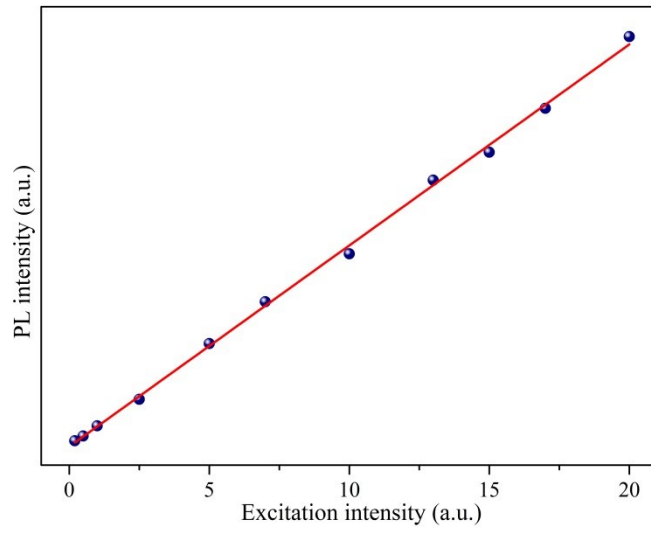

Figure S5. The PL intensity versus excitation power for (TBAC)SnCl<sub>3</sub> SCs at room temperature.

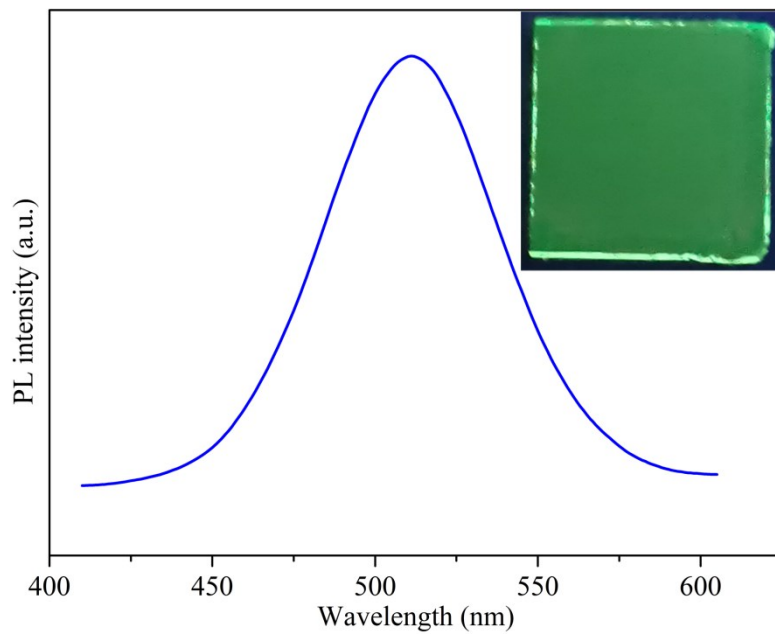

Figure S6. The PL spectrum of (TBAC)SnCl<sub>3</sub> film at room temperature, and the inset shows the optical photographs of (TBAC)SnCl<sub>3</sub> film under 254 nm UV light.

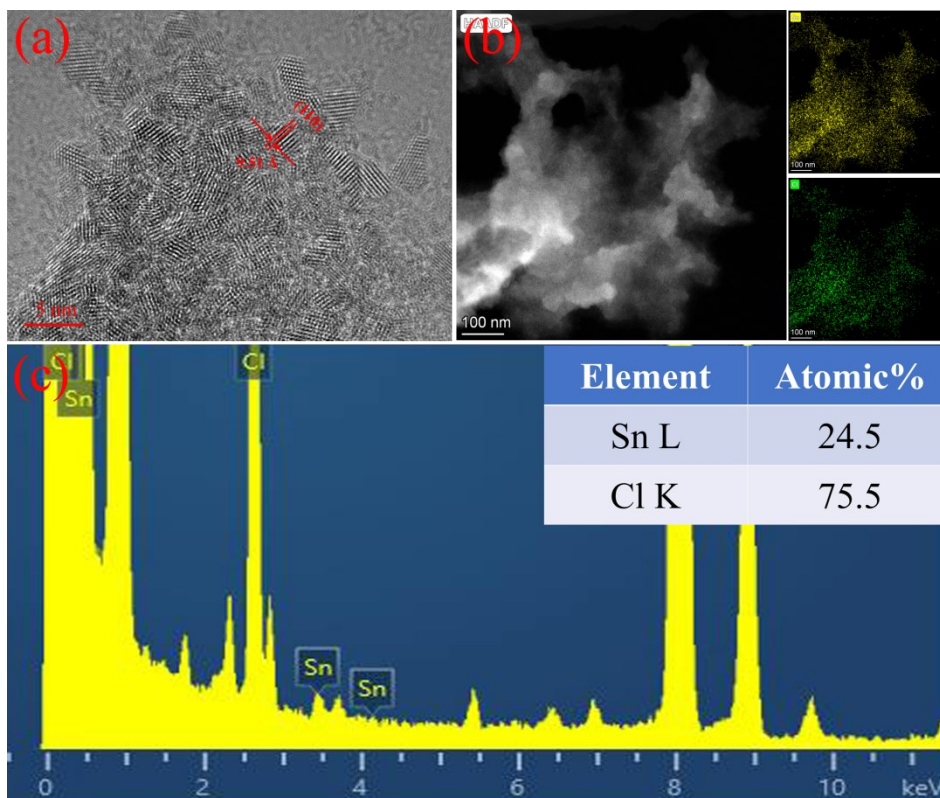

Figure S7. (a) The HRTEM, (b) The high-angle annular dark-field (HAADF) image and (c) The EDS analysis of the (TBAC)SnCl<sub>3</sub>.

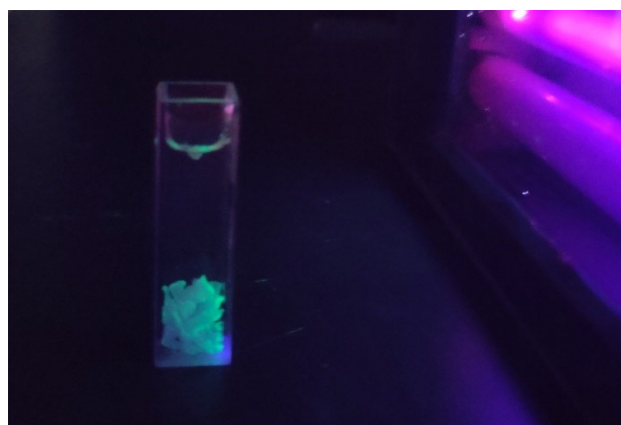

Figure S8. The optical image of (TBAC)SnCl<sub>3</sub> SCs under 254 nm UV lamp in the deionized water after 24 hours.

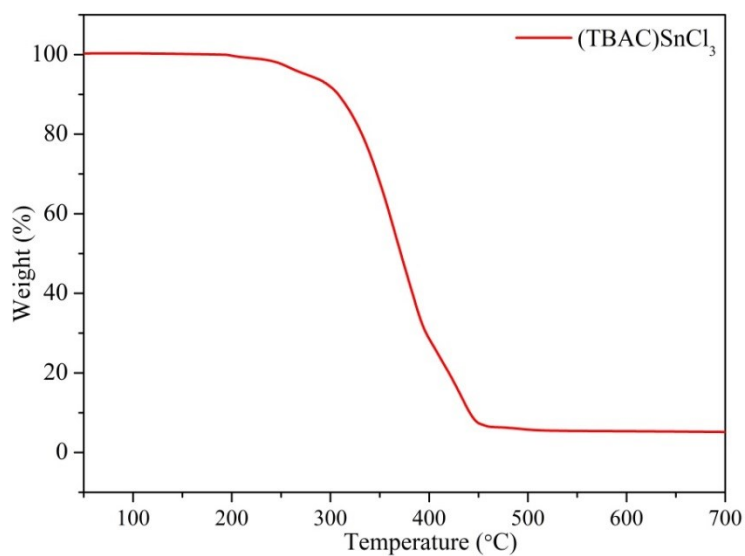

Figure S9. TG curve of (TBAC)SnCl<sub>3</sub> powders.

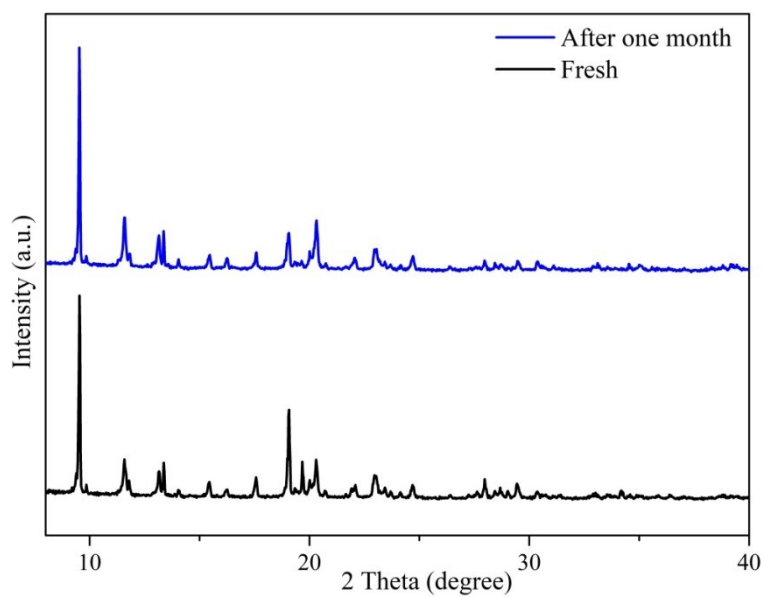

Figure S10. PXRD patterns of (TBAC)SnCl<sub>3</sub> before and after exposure to atmospheric environment ( $\sim 55\%$  relative humidity) for one month.

## References

1. Lin H. et al. Bulk Assembly of Zero-Dimensional Organic Lead Bromide Hybrid with Efficient Blue Emission. *ACS Materials Lett.*, **2019**, 1, 594-598.
2. Benin B. M. et al. Highly Emissive Self-Trapped Excitons in Fully Inorganic Zero-Dimensional Tin Halides. *Angew. Chem. Int. Ed.*, 2018, 57, 11329-11333.
3. Zhou C, et al. Low Dimensional Organic Tin Bromide Perovskites and Their Photoinduced Structural Transformation. *Angew. Chem. Int. Ed.*, **2017**, 56, 9018-9022.
4. Su B, et al. Synthesis, Crystal Structure and Green Luminescence in ZeroDimensional Tin Halide  $(C_8H_{14}N_2)_2SnBr_6$ . *Inorg. Chem.*, **2020**, 59, 9962-9968.
5. Creason T. D, et al.  $Rb_2CuX_3$  (X = Cl, Br): 1D All-Inorganic Copper Halides with Ultrabright Blue Emission and Up-Conversion Photoluminescence. *Adv. Optical Mater.*, **2019**, 8, 1901338.
6. Creason T. D, et al.  $K_2CuX_3$  (X = Cl, Br): All-Inorganic Lead-Free Blue Emitters with Near Unity Photoluminescence Quantum Yield. *Chem. Mater.*, **2020**, 32, 6197-6205.
7. Sun C, et al. [DMEDA]PbCl<sub>4</sub>: One-dimensional Organic Lead Halide Perovskite with Efficient Yellow Emission. *CrystEngComm*, **2020**, 22, 1480-1486.
8. Dohner E. R, et al. Self-Assembly of Broadband White-Light Emitters. *J. Am. Chem. Soc.*, **2014**, 136, 1718-1721.
9. Wang A, et al. Aqueous Acid-Based Synthesis of Lead-Free Tin Halide Perovskites with Near-Unity Photoluminescence Quantum Efficiency. *Chem. Sci.*, **2019**, 10, 4573-4579.
10. Liu Y, et al. Alkylamine Screening and Zinc Doping of Highly Luminescent 2D Tin-Halide Perovskites for LED Lighting. *Mater. Adv.*, **2021**, 2, 1320-1327.
